# Supplementary material
Source: Springer Nature journal article supplement (https://www.springermedizin.de/resource/supplementary/12943_2012_1060_MOESM8_ESM.pdf/9552198)

## LDHA

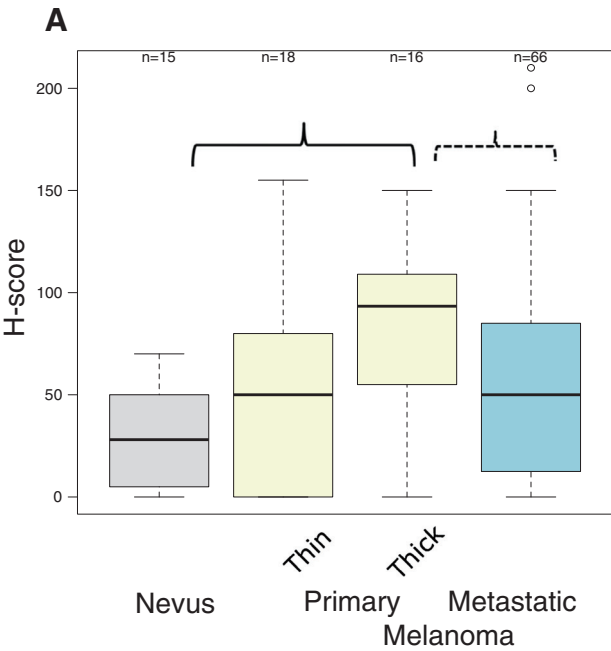HIF-1 $\alpha$ 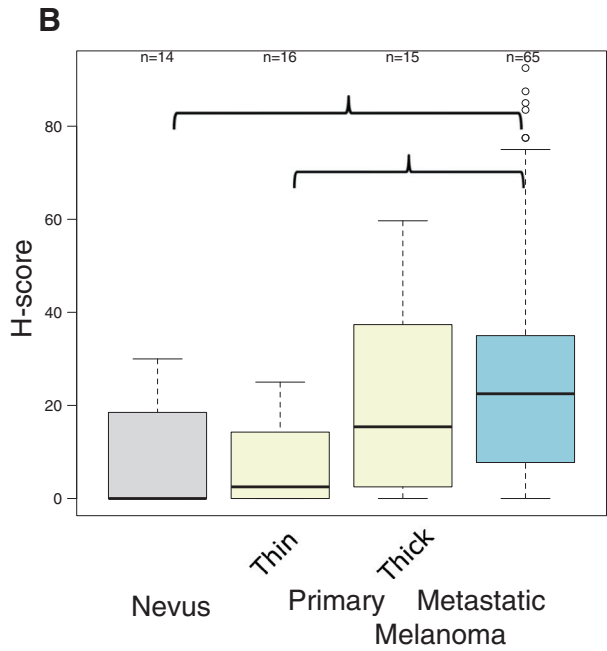

Supplement: MOESM8 [file 9552198]
